# Supplementary material
Source: publisher site journal article supplement (https://www.dovepress.com/article/539573)
Supplement: Supplementary file 1 [file 539573%20Supplementary%20file.docx]

Supplementary table 1: Summary of AUC values for different weights (PAB*weight);

| Weight | lower bound of AUC | AUC | upper bound of AUC |
| --- | --- | --- | --- |
| 0.01 | 0.601657 | 0.654544 | 0.707431 |
| 0.015 | 0.616421 | 0.668279 | 0.720137 |
| 0.02 | 0.629188 | 0.680202 | 0.731216 |
| 0.025 | 0.639453 | 0.689743 | 0.740034 |
| 0.03 | 0.64933 | 0.698982 | 0.748635 |
| 0.035 | 0.656093 | 0.705272 | 0.75445 |
| 0.04 | 0.661502 | 0.710349 | 0.759195 |
| 0.045 | 0.665091 | 0.713601 | 0.762111 |
| 0.05 | 0.668074 | 0.716316 | 0.764558 |
| 0.055 | 0.669784 | 0.717832 | 0.76588 |
| 0.06 | 0.67074 | 0.718539 | 0.766339 |
| 0.065 | 0.671639 | 0.719303 | 0.766968 |
| 0.07 | 0.672225 | 0.719739 | 0.767253 |
| 0.075 | 0.672947 | 0.720314 | 0.76768 |
| 0.08 | 0.673202 | 0.720484 | 0.767766 |
| 0.085 | 0.672583 | 0.719821 | 0.767059 |
| 0.09 | 0.672879 | 0.720067 | 0.767255 |
| 0.095 | 0.672875 | 0.719979 | 0.767083 |
| 0.1 | 0.672894 | 0.719922 | 0.766951 |
| 0.105 | 0.67283 | 0.719815 | 0.7668 |
| 0.11 | 0.672516 | 0.719474 | 0.766432 |
| 0.115 | 0.672491 | 0.719398 | 0.766306 |
| 0.12 | 0.672123 | 0.719007 | 0.76589 |
| 0.125 | 0.671722 | 0.71859 | 0.765458 |
| 0.13 | 0.671236 | 0.718116 | 0.764996 |
| 0.135 | 0.671314 | 0.71816 | 0.765007 |
| 0.14 | 0.670935 | 0.717781 | 0.764628 |
| 0.145 | 0.67061 | 0.717453 | 0.764296 |
| 0.15 | 0.670081 | 0.716961 | 0.76384 |
| 0.155 | 0.66982 | 0.71667 | 0.76352 |
| 0.16 | 0.66932 | 0.71619 | 0.76306 |
| 0.165 | 0.669002 | 0.715849 | 0.762697 |
| 0.17 | 0.668597 | 0.715445 | 0.762293 |
| 0.175 | 0.6685 | 0.715338 | 0.762175 |
| 0.18 | 0.6682 | 0.715028 | 0.761856 |
| 0.185 | 0.667893 | 0.714706 | 0.761519 |
| 0.19 | 0.667702 | 0.714573 | 0.761445 |
| 0.195 | 0.667444 | 0.714315 | 0.761185 |
| 0.2 | 0.667058 | 0.713948 | 0.760838 |
| 0.205 | 0.666937 | 0.713828 | 0.76072 |
| 0.21 | 0.666883 | 0.713765 | 0.760647 |
| 0.215 | 0.666428 | 0.713311 | 0.760193 |
| 0.22 | 0.666086 | 0.713001 | 0.759916 |
| 0.225 | 0.666064 | 0.712976 | 0.759887 |
| 0.23 | 0.66567 | 0.712603 | 0.759537 |
| 0.235 | 0.665304 | 0.712262 | 0.75922 |
| 0.24 | 0.665001 | 0.711953 | 0.758904 |
| 0.245 | 0.664787 | 0.711751 | 0.758714 |
| 0.25 | 0.66427 | 0.711283 | 0.758297 |
| 0.255 | 0.664032 | 0.711056 | 0.758081 |
| 0.26 | 0.663737 | 0.710791 | 0.757845 |
| 0.265 | 0.663624 | 0.710677 | 0.757731 |
| 0.27 | 0.663287 | 0.710368 | 0.757448 |
| 0.275 | 0.663003 | 0.710109 | 0.757215 |
| 0.28 | 0.662755 | 0.709875 | 0.756995 |
| 0.285 | 0.662566 | 0.709692 | 0.756818 |
| 0.29 | 0.662306 | 0.709446 | 0.756586 |
| 0.295 | 0.66219 | 0.709326 | 0.756462 |
| 0.3 | 0.662053 | 0.709187 | 0.75632 |
| 0.305 | 0.661793 | 0.708947 | 0.756101 |
| 0.31 | 0.661556 | 0.70872 | 0.755884 |
| 0.315 | 0.661267 | 0.708448 | 0.755629 |
| 0.32 | 0.661083 | 0.708278 | 0.755472 |
| 0.325 | 0.660762 | 0.707981 | 0.755199 |
| 0.33 | 0.66069 | 0.707911 | 0.755132 |
| 0.335 | 0.660589 | 0.70781 | 0.755031 |
| 0.34 | 0.660455 | 0.707671 | 0.754887 |
| 0.345 | 0.660349 | 0.707583 | 0.754817 |
| 0.35 | 0.660224 | 0.707469 | 0.754714 |
| 0.355 | 0.660077 | 0.707324 | 0.754571 |
| 0.36 | 0.659917 | 0.707179 | 0.754441 |
| 0.365 | 0.659694 | 0.706964 | 0.754234 |
| 0.37 | 0.659573 | 0.70685 | 0.754128 |
| 0.375 | 0.659433 | 0.706718 | 0.754002 |
| 0.38 | 0.659335 | 0.706629 | 0.753924 |
| 0.385 | 0.659112 | 0.706408 | 0.753705 |
| 0.39 | 0.658988 | 0.706282 | 0.753576 |
| 0.395 | 0.658721 | 0.706029 | 0.753338 |
| 0.4 | 0.658452 | 0.705764 | 0.753077 |
| 0.405 | 0.658294 | 0.705619 | 0.752944 |
| 0.41 | 0.658071 | 0.705423 | 0.752775 |
| 0.415 | 0.657998 | 0.705354 | 0.75271 |
| 0.42 | 0.657862 | 0.705221 | 0.752581 |
| 0.425 | 0.657596 | 0.704969 | 0.752341 |
| 0.43 | 0.657315 | 0.704703 | 0.752092 |
| 0.435 | 0.65714 | 0.704533 | 0.751926 |
| 0.44 | 0.656956 | 0.704356 | 0.751756 |
| 0.445 | 0.656782 | 0.704192 | 0.751601 |
| 0.45 | 0.656658 | 0.704066 | 0.751473 |
| 0.455 | 0.656501 | 0.70392 | 0.751339 |
| 0.46 | 0.656326 | 0.703756 | 0.751186 |
| 0.465 | 0.656197 | 0.703642 | 0.751088 |
| 0.47 | 0.656123 | 0.703573 | 0.751023 |
| 0.475 | 0.655973 | 0.703447 | 0.75092 |
| 0.48 | 0.65588 | 0.703365 | 0.750849 |
| 0.485 | 0.655667 | 0.703156 | 0.750646 |
| 0.49 | 0.655511 | 0.703011 | 0.750511 |
| 0.495 | 0.655417 | 0.702923 | 0.750428 |
| 0.5 | 0.655303 | 0.702809 | 0.750315 |
| 0.505 | 0.655097 | 0.702613 | 0.750129 |
| 0.51 | 0.6549 | 0.70243 | 0.74996 |
| 0.515 | 0.654745 | 0.702291 | 0.749837 |
| 0.52 | 0.654586 | 0.702139 | 0.749693 |
| 0.525 | 0.654441 | 0.702001 | 0.74956 |
| 0.53 | 0.654401 | 0.701963 | 0.749525 |
| 0.535 | 0.654315 | 0.701881 | 0.749446 |
| 0.54 | 0.65424 | 0.701805 | 0.74937 |
| 0.545 | 0.654115 | 0.701691 | 0.749267 |
| 0.55 | 0.654126 | 0.701704 | 0.749282 |
| 0.555 | 0.654025 | 0.701609 | 0.749193 |
| 0.56 | 0.653911 | 0.701495 | 0.749079 |
| 0.565 | 0.653761 | 0.70135 | 0.748939 |
| 0.57 | 0.653611 | 0.701218 | 0.748824 |
| 0.575 | 0.653549 | 0.701154 | 0.748759 |
| 0.58 | 0.653488 | 0.701098 | 0.748707 |
| 0.585 | 0.653378 | 0.70099 | 0.748603 |
| 0.59 | 0.653363 | 0.700978 | 0.748592 |
| 0.595 | 0.653334 | 0.700946 | 0.748558 |
| 0.6 | 0.653251 | 0.70087 | 0.748489 |
| 0.605 | 0.653205 | 0.700826 | 0.748447 |
| 0.61 | 0.653205 | 0.700826 | 0.748447 |
| 0.615 | 0.653158 | 0.700788 | 0.748419 |
| 0.62 | 0.6531 | 0.700738 | 0.748376 |
| 0.625 | 0.653005 | 0.700649 | 0.748293 |
| 0.63 | 0.652918 | 0.700567 | 0.748216 |
| 0.635 | 0.652863 | 0.70051 | 0.748158 |
| 0.64 | 0.652749 | 0.700403 | 0.748057 |
| 0.645 | 0.652736 | 0.700384 | 0.748032 |
| 0.65 | 0.652721 | 0.700371 | 0.748022 |
| 0.655 | 0.652674 | 0.700321 | 0.747968 |
| 0.66 | 0.652613 | 0.700251 | 0.74789 |
| 0.665 | 0.652514 | 0.700157 | 0.747799 |
| 0.67 | 0.65243 | 0.700075 | 0.747719 |
| 0.675 | 0.652345 | 0.699992 | 0.74764 |
| 0.68 | 0.652256 | 0.699904 | 0.747552 |
| 0.685 | 0.652233 | 0.699879 | 0.747525 |
| 0.69 | 0.652148 | 0.699803 | 0.747458 |
| 0.695 | 0.652146 | 0.699797 | 0.747447 |
| 0.7 | 0.652087 | 0.69974 | 0.747393 |
| 0.705 | 0.652035 | 0.699689 | 0.747343 |
| 0.71 | 0.651987 | 0.699639 | 0.74729 |
| 0.715 | 0.651958 | 0.699614 | 0.747269 |
| 0.72 | 0.651949 | 0.699607 | 0.747266 |
| 0.725 | 0.651844 | 0.699519 | 0.747193 |
| 0.73 | 0.651778 | 0.699456 | 0.747133 |
| 0.735 | 0.651759 | 0.699437 | 0.747114 |
| 0.74 | 0.651682 | 0.699367 | 0.747052 |
| 0.745 | 0.651591 | 0.699285 | 0.746979 |
| 0.75 | 0.651548 | 0.699247 | 0.746947 |
| 0.755 | 0.651504 | 0.699209 | 0.746914 |
| 0.76 | 0.651492 | 0.699197 | 0.746901 |
| 0.765 | 0.65147 | 0.699178 | 0.746886 |
| 0.77 | 0.651439 | 0.699146 | 0.746853 |
| 0.775 | 0.651399 | 0.699108 | 0.746817 |
| 0.78 | 0.651295 | 0.699014 | 0.746733 |
| 0.785 | 0.651291 | 0.699007 | 0.746724 |
| 0.79 | 0.651259 | 0.698976 | 0.746692 |
| 0.795 | 0.651215 | 0.698932 | 0.746648 |
| 0.8 | 0.651134 | 0.698856 | 0.746578 |
| 0.805 | 0.651039 | 0.698767 | 0.746496 |
| 0.81 | 0.651017 | 0.698748 | 0.74648 |
| 0.815 | 0.650945 | 0.698679 | 0.746413 |
| 0.82 | 0.650921 | 0.698654 | 0.746386 |
| 0.825 | 0.650889 | 0.698622 | 0.746355 |
| 0.83 | 0.650866 | 0.698597 | 0.746328 |
| 0.835 | 0.650818 | 0.698546 | 0.746275 |
| 0.84 | 0.650806 | 0.698527 | 0.746249 |
| 0.845 | 0.650745 | 0.698477 | 0.746208 |
| 0.85 | 0.650766 | 0.698489 | 0.746213 |
| 0.855 | 0.650707 | 0.698433 | 0.746159 |
| 0.86 | 0.650617 | 0.698351 | 0.746084 |
| 0.865 | 0.65055 | 0.698287 | 0.746024 |
| 0.87 | 0.650485 | 0.698231 | 0.745976 |
| 0.875 | 0.650491 | 0.698237 | 0.745982 |
| 0.88 | 0.650456 | 0.698205 | 0.745955 |
| 0.885 | 0.650414 | 0.698161 | 0.745909 |
| 0.89 | 0.650407 | 0.698155 | 0.745903 |
| 0.895 | 0.650386 | 0.698136 | 0.745886 |
| 0.9 | 0.650342 | 0.698092 | 0.745842 |
| 0.905 | 0.65028 | 0.698035 | 0.745789 |
| 0.91 | 0.650302 | 0.698054 | 0.745805 |
| 0.915 | 0.650237 | 0.697984 | 0.745732 |
| 0.92 | 0.650207 | 0.697953 | 0.745698 |
| 0.925 | 0.650121 | 0.697871 | 0.74562 |
| 0.93 | 0.650042 | 0.697795 | 0.745547 |
| 0.935 | 0.650068 | 0.69782 | 0.745572 |
| 0.94 | 0.650021 | 0.697776 | 0.745531 |
| 0.945 | 0.649986 | 0.697744 | 0.745502 |
| 0.95 | 0.649944 | 0.6977 | 0.745456 |
| 0.955 | 0.649898 | 0.697656 | 0.745414 |
| 0.96 | 0.649858 | 0.697618 | 0.745378 |
| 0.965 | 0.64985 | 0.697605 | 0.745361 |
| 0.97 | 0.649874 | 0.697631 | 0.745387 |
| 0.975 | 0.649907 | 0.697662 | 0.745417 |
| 0.98 | 0.649867 | 0.697624 | 0.745382 |
| 0.985 | 0.649804 | 0.697568 | 0.745331 |
| 0.99 | 0.649737 | 0.697504 | 0.745272 |
| 0.995 | 0.64967 | 0.697441 | 0.745212 |
| 1 | 0.649605 | 0.697378 | 0.745151 |

Supplementary table 2: Summary of AUC values for different weights (PAB/weight);

| Weight | lower bound of AUC | AUC | upper bound of AUC |
| --- | --- | --- | --- |
| 1.1 | 0.650308 | 0.69806 | 0.745812 |
| 1.2 | 0.650843 | 0.698572 | 0.7463 |
| 1.3 | 0.65144 | 0.699146 | 0.746852 |
| 1.4 | 0.651945 | 0.699601 | 0.747256 |
| 1.5 | 0.652488 | 0.700131 | 0.747775 |
| 1.6 | 0.653005 | 0.700649 | 0.748293 |
| 1.7 | 0.653417 | 0.701028 | 0.74864 |
| 1.8 | 0.654012 | 0.701596 | 0.749181 |
| 1.9 | 0.654409 | 0.701975 | 0.749541 |
| 2 | 0.655303 | 0.702809 | 0.750315 |
| 2.1 | 0.655935 | 0.703415 | 0.750896 |
| 2.2 | 0.656501 | 0.70392 | 0.75134 |
| 2.3 | 0.657146 | 0.704539 | 0.751932 |
| 2.4 | 0.65793 | 0.705291 | 0.752651 |
| 2.5 | 0.658511 | 0.705821 | 0.753131 |
| 2.6 | 0.659151 | 0.706446 | 0.753742 |
| 2.7 | 0.65956 | 0.706838 | 0.754115 |
| 2.8 | 0.660044 | 0.707299 | 0.754553 |
| 2.9 | 0.660362 | 0.707596 | 0.754829 |
| 3 | 0.660676 | 0.707892 | 0.755109 |
| 3.1 | 0.660982 | 0.708189 | 0.755396 |
| 3.2 | 0.661425 | 0.708593 | 0.755761 |
| 3.3 | 0.661912 | 0.709061 | 0.756209 |
| 3.4 | 0.662207 | 0.709338 | 0.75647 |
| 3.5 | 0.662458 | 0.709585 | 0.756712 |
| 3.6 | 0.662854 | 0.709976 | 0.757099 |
| 3.7 | 0.663253 | 0.710336 | 0.75742 |
| 3.8 | 0.663617 | 0.710677 | 0.757737 |
| 3.9 | 0.663909 | 0.710955 | 0.758002 |
| 4 | 0.66427 | 0.711283 | 0.758297 |
| 4.1 | 0.664832 | 0.711789 | 0.758745 |
| 4.2 | 0.665061 | 0.712016 | 0.758971 |
| 4.3 | 0.665484 | 0.712426 | 0.759369 |
| 4.4 | 0.665756 | 0.712692 | 0.759627 |
| 4.5 | 0.666096 | 0.713007 | 0.759918 |
| 4.6 | 0.666334 | 0.713235 | 0.760136 |
| 4.7 | 0.666574 | 0.713456 | 0.760337 |
| 4.8 | 0.666983 | 0.713866 | 0.76075 |
| 4.9 | 0.667026 | 0.713923 | 0.76082 |
| 5 | 0.66719 | 0.714068 | 0.760947 |
| 5.1 | 0.66733 | 0.714201 | 0.761072 |
| 5.2 | 0.667579 | 0.714447 | 0.761315 |
| 5.3 | 0.667854 | 0.714706 | 0.761558 |
| 5.4 | 0.667851 | 0.714668 | 0.761485 |
| 5.5 | 0.668101 | 0.714914 | 0.761728 |
| 5.6 | 0.668334 | 0.715173 | 0.762012 |
| 5.7 | 0.668509 | 0.71535 | 0.762191 |
| 5.8 | 0.668455 | 0.7153 | 0.762145 |
| 5.9 | 0.668627 | 0.715489 | 0.762351 |
| 6 | 0.668895 | 0.715754 | 0.762614 |
| 6.1 | 0.669007 | 0.715868 | 0.762729 |
| 6.2 | 0.66934 | 0.716209 | 0.763079 |
| 6.3 | 0.66936 | 0.716228 | 0.763096 |
| 6.4 | 0.669634 | 0.716487 | 0.76334 |
| 6.5 | 0.670019 | 0.716866 | 0.763713 |
| 6.6 | 0.670096 | 0.716954 | 0.763812 |
| 6.7 | 0.670172 | 0.717055 | 0.763939 |
| 6.8 | 0.670293 | 0.717163 | 0.764032 |
| 6.9 | 0.670681 | 0.717523 | 0.764364 |
| 7 | 0.670861 | 0.717712 | 0.764563 |
| 7.1 | 0.670836 | 0.717687 | 0.764538 |
| 7.2 | 0.671049 | 0.717889 | 0.764729 |
| 7.3 | 0.671245 | 0.718091 | 0.764937 |
| 7.4 | 0.671275 | 0.718122 | 0.76497 |
| 7.5 | 0.67138 | 0.718211 | 0.765041 |
| 7.6 | 0.671446 | 0.71828 | 0.765114 |
| 7.7 | 0.671272 | 0.718154 | 0.765036 |
| 7.8 | 0.67143 | 0.718306 | 0.765181 |
| 7.9 | 0.67148 | 0.718369 | 0.765257 |
| 8 | 0.671722 | 0.71859 | 0.765458 |
| 8.1 | 0.67185 | 0.718722 | 0.765594 |
| 8.2 | 0.671996 | 0.718874 | 0.765752 |
| 8.3 | 0.67208 | 0.718969 | 0.765857 |
| 8.4 | 0.672111 | 0.719 | 0.765889 |
| 8.5 | 0.672285 | 0.719177 | 0.766069 |
| 8.6 | 0.672381 | 0.719284 | 0.766188 |
| 8.7 | 0.672483 | 0.719392 | 0.7663 |
| 8.8 | 0.672416 | 0.719354 | 0.766292 |
| 8.9 | 0.672477 | 0.719417 | 0.766357 |
| 9 | 0.672424 | 0.719373 | 0.766322 |
| 9.1 | 0.67251 | 0.719468 | 0.766425 |
| 9.2 | 0.672612 | 0.719581 | 0.76655 |
| 9.3 | 0.672884 | 0.719834 | 0.766783 |
| 9.4 | 0.672888 | 0.719834 | 0.76678 |
| 9.5 | 0.672834 | 0.719815 | 0.766796 |
| 9.6 | 0.67298 | 0.719954 | 0.766927 |
| 9.7 | 0.673031 | 0.720011 | 0.766991 |
| 9.8 | 0.672888 | 0.719872 | 0.766856 |
| 9.9 | 0.672963 | 0.71996 | 0.766958 |
| 10 | 0.672929 | 0.719947 | 0.766966 |
| 10.1 | 0.672962 | 0.719998 | 0.767034 |
| 10.2 | 0.672929 | 0.719979 | 0.767029 |
| 10.3 | 0.672858 | 0.719935 | 0.767012 |
| 10.4 | 0.67291 | 0.719992 | 0.767074 |
| 10.5 | 0.672884 | 0.719979 | 0.767074 |
| 10.6 | 0.67297 | 0.720074 | 0.767178 |
| 10.7 | 0.672962 | 0.720112 | 0.767261 |
| 10.8 | 0.673075 | 0.720232 | 0.767388 |
| 10.9 | 0.672906 | 0.720086 | 0.767267 |
| 11 | 0.673007 | 0.720175 | 0.767343 |
| 11.1 | 0.67292 | 0.720099 | 0.767278 |
| 11.2 | 0.67285 | 0.720055 | 0.76726 |
| 11.3 | 0.672626 | 0.719859 | 0.767092 |
| 11.4 | 0.672726 | 0.719947 | 0.767169 |
| 11.5 | 0.672786 | 0.719992 | 0.767197 |
| 11.6 | 0.672775 | 0.719979 | 0.767183 |
| 11.7 | 0.672733 | 0.719947 | 0.767162 |
| 11.8 | 0.672536 | 0.719783 | 0.767031 |
| 11.9 | 0.672591 | 0.719834 | 0.767076 |
| 12 | 0.672695 | 0.719947 | 0.7672 |
| 12.1 | 0.672671 | 0.719935 | 0.767199 |
| 12.2 | 0.672986 | 0.720263 | 0.76754 |
| 12.3 | 0.67308 | 0.720352 | 0.767623 |
| 12.4 | 0.673079 | 0.720352 | 0.767625 |
| 12.5 | 0.673174 | 0.720459 | 0.767744 |
| 12.6 | 0.673179 | 0.720472 | 0.767764 |
| 12.7 | 0.673168 | 0.720453 | 0.767738 |
| 12.8 | 0.673336 | 0.720611 | 0.767885 |
| 12.9 | 0.673283 | 0.720579 | 0.767875 |
| 13 | 0.67313 | 0.720465 | 0.7678 |
| 13.1 | 0.672968 | 0.720314 | 0.76766 |
| 13.2 | 0.672954 | 0.720307 | 0.767661 |
| 13.3 | 0.672831 | 0.7202 | 0.767569 |
| 13.4 | 0.672951 | 0.720326 | 0.767702 |
| 13.5 | 0.672805 | 0.720206 | 0.767607 |
| 13.6 | 0.67262 | 0.720042 | 0.767464 |
| 13.7 | 0.672482 | 0.719935 | 0.767388 |
| 13.8 | 0.672363 | 0.719827 | 0.767292 |
| 13.9 | 0.67248 | 0.71996 | 0.76744 |
| 14 | 0.672421 | 0.71991 | 0.767398 |
| 14.1 | 0.672381 | 0.719884 | 0.767388 |
| 14.2 | 0.672327 | 0.719821 | 0.767316 |
| 14.3 | 0.672204 | 0.71972 | 0.767236 |
| 14.4 | 0.672267 | 0.719796 | 0.767325 |
| 14.5 | 0.672073 | 0.719638 | 0.767203 |
| 14.6 | 0.672043 | 0.719638 | 0.767233 |
| 14.7 | 0.671815 | 0.71943 | 0.767044 |
| 14.8 | 0.671973 | 0.7196 | 0.767227 |
| 14.9 | 0.672051 | 0.71967 | 0.767288 |
| 15 | 0.671831 | 0.719474 | 0.767117 |
| 15.1 | 0.671693 | 0.719341 | 0.766989 |
| 15.2 | 0.671652 | 0.719316 | 0.76698 |
| 15.3 | 0.671596 | 0.719253 | 0.766909 |
| 15.4 | 0.671592 | 0.719259 | 0.766926 |
| 15.5 | 0.671414 | 0.719101 | 0.766789 |
| 15.6 | 0.671514 | 0.719196 | 0.766877 |
| 15.7 | 0.671392 | 0.719089 | 0.766785 |
| 15.8 | 0.671379 | 0.719076 | 0.766773 |
| 15.9 | 0.671319 | 0.719025 | 0.766731 |
| 16 | 0.671175 | 0.718906 | 0.766636 |
| 16.1 | 0.671142 | 0.718887 | 0.766631 |
| 16.2 | 0.670944 | 0.71871 | 0.766476 |
| 16.3 | 0.670884 | 0.718672 | 0.76646 |
| 16.4 | 0.670883 | 0.718666 | 0.766448 |
| 16.5 | 0.670889 | 0.718672 | 0.766455 |
| 16.6 | 0.670781 | 0.718577 | 0.766373 |
| 16.7 | 0.670756 | 0.718558 | 0.76636 |
| 16.8 | 0.670706 | 0.718533 | 0.766359 |
| 16.9 | 0.670622 | 0.71847 | 0.766317 |
| 17 | 0.67077 | 0.718609 | 0.766447 |
| 17.1 | 0.670697 | 0.718558 | 0.766419 |
| 17.2 | 0.670714 | 0.718571 | 0.766428 |
| 17.3 | 0.67062 | 0.718495 | 0.76637 |
| 17.4 | 0.670589 | 0.718476 | 0.766364 |
| 17.5 | 0.670474 | 0.718375 | 0.766276 |
| 17.6 | 0.670387 | 0.718306 | 0.766225 |
| 17.7 | 0.670128 | 0.718091 | 0.766054 |
| 17.8 | 0.67014 | 0.718104 | 0.766067 |
| 17.9 | 0.670051 | 0.718028 | 0.766004 |
| 18 | 0.670008 | 0.718002 | 0.765997 |
| 18.1 | 0.669878 | 0.717901 | 0.765925 |
| 18.2 | 0.669762 | 0.717813 | 0.765864 |
| 18.3 | 0.669678 | 0.71775 | 0.765822 |
| 18.4 | 0.669512 | 0.717611 | 0.76571 |
| 18.5 | 0.669295 | 0.717409 | 0.765523 |
| 18.6 | 0.669151 | 0.717276 | 0.765401 |
| 18.7 | 0.669033 | 0.717169 | 0.765304 |
| 18.8 | 0.66897 | 0.717112 | 0.765255 |
| 18.9 | 0.668911 | 0.717055 | 0.765199 |
| 19 | 0.66882 | 0.716973 | 0.765126 |
| 19.1 | 0.668761 | 0.716929 | 0.765097 |
| 19.2 | 0.668511 | 0.716702 | 0.764893 |
| 19.3 | 0.6684 | 0.716601 | 0.764801 |
| 19.4 | 0.668436 | 0.716638 | 0.764841 |
| 19.5 | 0.668442 | 0.716638 | 0.764834 |
| 19.6 | 0.668495 | 0.716695 | 0.764896 |
| 19.7 | 0.668371 | 0.716588 | 0.764805 |
| 19.8 | 0.668165 | 0.716398 | 0.764632 |
| 19.9 | 0.668199 | 0.716424 | 0.764649 |
| 20 | 0.668125 | 0.716373 | 0.764622 |

Supplementary table 3: Results of univariate Cox models of baseline variables;

| Variables | Cohort 1 | | Cohort 2 | |
| --- | --- | --- | --- | --- |
| HR (95% CI for HR) | p value | HR (95% CI for HR) | p value |
| Location of fracture(femoral neck) | 0.662 [0.461, 0.950] | 0.025 | 0.972 [0.673, 1.403] | 0.88 |
| Sex(female) | 0.912 [0.628, 1.325] | 0.629 | 0.990 [0.671, 1.461] | 0.959 |
| BMI (kg/m2 ) | 0.987 [0.942, 1.035] | 0.592 | 1.006 [0.962, 1.051] | 0.798 |
| Electrocardiogram (abnormal) | 1.075 [0.751, 1.538] | 0.693 | 0.698 [0.483, 1.007] | 0.055 |
| Age(years) | 1.116 [1.092, 1.140] | <0.001 | 1.117 [1.091, 1.144] | <0.001 |
| Chest radiograph (abnormal) | 1.513 [1.060, 2.161] | 0.023 | 0.807 [0.558, 1.167] | 0.254 |
| Smoking history (yes) | 0.897 [0.438, 1.838] | 0.767 | 1.274 [0.740, 2.193] | 0.382 |
| Alcoholism history(yes) | 1.748 [0.769, 3.971] | 0.182 | 0.983 [0.432, 2.237] | 0.968 |
| Hypertension(yes) | 1.632 [1.132, 2.354] | 0.009 | 0.713 [0.494, 1.029] | 0.07 |
| Fractures history (yes) | 0.846 [0.507, 1.412] | 0.522 | 1.310 [0.809, 2.123] | 0.272 |
| Polytrauma(yes) | 1.080 [0.638, 1.827] | 0.774 | 1.200 [0.733, 1.964] | 0.468 |
| CCI score (>4) | 1.828 [1.252, 2.667] | 0.002 | 1.258 [0.840, 1.886] | 0.266 |
| Time from injury to surgery (Days) | 1.004 [0.980, 1.030] | 0.724 | 1.082 [0.887, 1.321] | 0.436 |
| Surgical procedures(arthroplasty) | 1.107 [0.768, 1.597] | 0.586 | 0.828 [0.571, 1.200] | 0.319 |
| Anesthesia (spinal) | 0.000 [0.000, Inf] | 0.993 | 0.000 [0.000, Inf] | 0.994 |
| GLU (mmol/L) | 0.984 [0.931, 1.041] | 0.583 | 0.944 [0.826, 1.078] | 0.393 |
| ALB (g/L) | 0.968 [0.934, 1.004] | 0.079 | 1.004 [0.984, 1.025] | 0.678 |
| Continuous PNI | 0.941 [0.912, 0.971] | <0.001 | 0.983 [0.964, 1.002] | 0.072 |
| Continuous PAPNI | 0.879 [0.849, 0.910] | <0.001 | 0.898 [0.873, 0.923] | <0.001 |
| Low PAPNI | 4.083 [2.775, 6.007] | <0.001 | 4.947 [3.174, 7.712] | <0.001 |
| Low PNI | 1.573 [1.085, 2.281] | 0.017 | 1.259 [0.866, 1.830] | 0.228 |

Supplementary table 4: Results of univariate Logistics models for 1-year free walking ability.

| Variables | Cohort 1 | | Cohort 2 | |
| --- | --- | --- | --- | --- |
| OR (95% CI for OR) | p value | OR (95% CI for OR) | p value |
| Location of fracture(femoral neck) | 2.028 [1.486, 2.781] | <0.001 | 1.263 [0.898, 1.779] | 0.18 |
| Sex(female) | 0.769 [0.549, 1.070] | 0.123 | 0.967 [0.670, 1.386] | 0.857 |
| BMI (kg/m2 ) | 1.002 [0.964, 1.043] | 0.922 | 0.997 [0.957, 1.038] | 0.883 |
| Electrocardiogram (abnormal) | 0.785 [0.575, 1.068] | 0.125 | 1.075 [0.761, 1.516] | 0.679 |
| Age(years) | 0.880 [0.861, 0.898] | <0.001 | 0.952 [0.935, 0.969] | <0.001 |
| Chest radiograph (abnormal) | 0.595 [0.437, 0.809] | 0.001 | 1.057 [0.752, 1.487] | 0.751 |
| Smoking history (yes) | 1.095 [0.610, 2.055] | 0.767 | 0.873 [0.520, 1.507] | 0.614 |
| Alcoholism history(yes) | 0.475 [0.205, 1.110] | 0.08 | 1.557 [0.707, 3.923] | 0.304 |
| Hypertension(yes) | 0.625 [0.458, 0.851] | 0.003 | 1.527 [1.084, 2.153] | 0.015 |
| Fractures history (yes) | 1.163 [0.766, 1.797] | 0.487 | 0.946 [0.591, 1.552] | 0.821 |
| Polytrauma(yes) | 0.863 [0.551, 1.375] | 0.526 | 1.087 [0.674, 1.803] | 0.738 |
| CCI score (>4) | 0.714 [0.501, 1.023] | 0.064 | 0.827 [0.564, 1.222] | 0.334 |
| Time from injury to surgery (Days) | 0.991 [0.966, 1.016] | 0.437 | 0.991 [0.824, 1.186] | 0.922 |
| Surgical procedures(arthroplasty) | 1.250 [0.906, 1.734] | 0.178 | 1.476 [1.045, 2.093] | 0.028 |
| Anesthesia (spinal) | 0.893 [0.085, 19.264] | 0.926 | 1.104 [0.140, 22.403] | 0.932 |
| GLU (mmol/L) | 0.998 [0.957, 1.044] | 0.926 | 1.041 [0.921, 1.178] | 0.521 |
| ALB (g/L) | 1.057 [1.024, 1.091] | 0.001 | 0.983 [0.964, 1.001] | 0.069 |
| Continuous PNI | 1.067 [1.037, 1.098] | <0.001 | 1.000 [0.983, 1.017] | 0.96 |
| Continuous PAPNI | 1.091 [1.058, 1.126] | <0.001 | 1.097 [1.069, 1.127] | <0.001 |
| Low PAPNI | 0.434 [0.317, 0.593] | <0.001 | 0.344 [0.240, 0.488] | <0.001 |
| Low PNI | 0.524 [0.380, 0.717] | <0.001 | 1.110 [0.788, 1.562] | 0.549 |
